# Supplementary material for: Short-Chain Fatty Acids Attenuate 5-Fluorouracil-Induced THP-1 Cell Inflammation through Inhibiting NF-κB/NLRP3 Signaling via Glycerolphospholipid and Sphingolipid Metabolism
Source: MDPI journal article supplement (doi:10.3390/molecules28020494), 2023-01-04
Supplement: s1 [file s1]

# Short-Chain Fatty Acids Attenuate 5-Fluorouracil-Induced THP-1 Cell Inflammation through Inhibiting NF- $\kappa$ B/NLRP3 Signaling via Glycerolphospholipid and Sphingolipid Metabolism

Yanyan Zhang <sup>1,†</sup>, Yue Xi <sup>2,†</sup>, Changshui Yang <sup>3</sup>, Weijuan Gong <sup>3,\*</sup>, Chengyin Wang <sup>1</sup>, Liang Wu <sup>4</sup> and Dongxu Wang <sup>5,\*</sup>

<sup>1</sup> Testing Center, Yangzhou University, Yangzhou 225009, China

<sup>2</sup> Medical Laboratory Department, Huai'an Second People's Hospital, Huai'an 223022, China

<sup>3</sup> School of Medicine, Yangzhou University, Yangzhou 225009, China

<sup>4</sup> Department of Laboratory Medicine, School of Medicine, Jiangsu University, Zhenjiang 212013, China

<sup>5</sup> School of Grain Science and Technology, Jiangsu University of Science and Technology, Zhenjiang 212100, China

\* Correspondence: wjgong@yzu.edu.cn (W.G.); wdx@just.edu.cn (D.W.)

† These authors contributed equally to this work.

Table S1. RT-PCR Primers sequence.

| Gene         | Primer sequence (5'→3')     |
|--------------|-----------------------------|
| GAPDH        | FP: CATCACTGCCACCCAGAAGACTG |
|              | RP: ATGCCAGTGAGCTTCCCGTTCAG |
| NLRP3        | FP: AACAGCCACCTCACTTCCAG    |
|              | RP: CCAACCACAATCTCCGAATG    |
| Caspase-1    | FP: GCACAAGACCTCTGACAGCA    |
|              | RP: TTGGGCAGTTCTTGGTATTC    |
| IL-1 $\beta$ | FP: CCTGTCCTGCGTGTTGAAAGA   |
|              | RP: GGGAAGTGGGCAGACTCAA     |
| IL-6         | FP: CCTTCGGTCCAGTTGCCTTCT   |
|              | RP: GAGGTGAGTGGCTGTCTGTGT   |
| IL-10        | FP: TCTCCGAGATGCCTTCAGCAGA  |
|              | RP: TCAGACAAGGCTTGGCAACCCA  |

Note: FP: forward primer; RP: reverse primer.
